# Supplementary material for: A NiII-cluster-based MOF as an efficient heterogeneous catalyst for the chemical transformation of CO2
Source: Royal Society of Chemistry journal article supplement (doi:10.1039/c8dt04284e), 2018-11-27
Supplement: c8dt04284e1.pdf [file c8dt04284e1.pdf]

# Supporting Information

## A Ni<sup>II</sup>-cluster based MOF as an efficient heterogeneous catalyst for chemical transformation of CO<sub>2</sub>

Chao-Ying Gao,<sup>a\*</sup> Yang Yang,<sup>a</sup> Jinghai Liu,<sup>a</sup> and Zhong-Ming Sun<sup>\*b</sup>

<sup>a</sup>Inner Mongolia Key Lab of Carbon Nanomaterials, Nano Innovation Institute (NII), College of Chemistry and Chemical Engineering, Inner Mongolia University for the Nationalities (IMUN), Tongliao 028000, People's Republic of China

E-mail: [gaocy945@imun.edu.cn](mailto:gaocy945@imun.edu.cn)

<sup>b</sup>State Key Laboratory of Rare Earth Resource Utilization, Changchun Institute of Applied Chemistry, Chinese Academy of Sciences, 5625 Renmin Street, Changchun, Jilin 130022, China

### Supplementary Index

Contents

- S1. Materials and Methods
- S2. Supplementary tables and figures
- S3. The NMR spectrums
- S4. References

## S1. Materials and Methods

### 1.1 General information

#### Materials and Instrument

All materials are commercially available and were used without further purification except for 5,5',5''-(methylsilanetriyl)trisophthalic acid ( $H_6L$ ), which was synthesized in our laboratory.

Powder X-ray diffraction (PXRD) was carried out at 40 kV and 40 mA on a MiniFlex 600 X-ray powder diffractometer equipped with a Cu sealed tube ( $\lambda = 1.54178 \text{ \AA}$ ) over  $2\theta$  range of 5-50° at room temperature. The infrared (IR) spectra (diamond) were recorded on a Nicolet 7600 FT-IR spectrometer within the 4000-500  $\text{cm}^{-1}$  region. Thermal gravimetric analysis (TGA) was conducted on a SDT 2960 Simultaneous DSC-TGA of TA instruments with a heating rate of 10 °C/min up to 900 °C under an air atmosphere. Elemental analyses for C, H, and N were performed by a VarioEL analyzer.  $^1\text{H}$  NMR spectra were carried out in  $\text{CDCl}_3$  solvent on a Bruker 400 MHz spectrometer. The chemical shift is given in dimensionless  $\delta$  values and is referenced relative to TMS in  $^1\text{H}$  spectroscopy. Inductively coupled plasma (ICP) analyses were conducted on a Perkin-Elmer Optima 3300DV spectrometer.

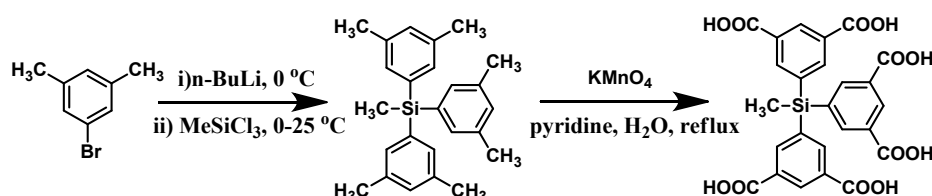

Scheme 1 The synthesis of 5,5',5''-(methylsilanetriyl)trisophthalic acid.

### 1.2 Single-Crystal X-ray Crystallography

Single-crystal X-ray diffraction (SXRD) data of compound  $\{[\text{Ni}_4\text{L}(\mu_3\text{-OH})_2(\text{H}_2\text{O})_6]\cdot 2(\text{H}_2\text{O})\cdot \text{DMA}\}_n$  were collected on a Bruker diffractometer using  $\text{Cu K}\alpha$  radiation ( $\lambda = 1.54178 \text{ \AA}$ ) at 293 K. Data processing was accomplished with the SAINT processing program.<sup>1</sup> The structure was solved by the direct methods and refined by full-matrix least-squares fitting on  $F^2$  using the SHELXTL crystallographic software package.<sup>2</sup> Non-hydrogen atoms were refined with anisotropic displacement parameters during the final cycles. All hydrogen atoms of the organic molecule were placed by geometrical considerations and were added to the structure factor calculation. The final formula of  $\{[\text{Ni}_4\text{L}(\mu_3\text{-OH})_2(\text{H}_2\text{O})_6]\cdot 2(\text{H}_2\text{O})\cdot \text{DMA}\}_n$  was determined by single-crystal X-ray diffraction, TGA and elemental analysis.

Crystallographic data for  $\{[\text{Ni}_4\text{L}(\mu_3\text{-OH})_2(\text{H}_2\text{O})_6]\cdot 2(\text{H}_2\text{O})\cdot \text{DMA}\}_n$  (1872271) has been deposited with Cambridge Crystallographic Data Centre. Data can be obtained free of charge upon request at [www.ccdc.cam.ac.uk/data\\_request/cif](http://www.ccdc.cam.ac.uk/data_request/cif). Crystal data and structure refinement is summarized in Table S1.

### 1.3 Catalysis

In a typical reaction, the catalytic reaction was conducted in a 20 mL autoclave reactor using the epoxides (20 mmol, 1850 mg for epichlorohydrin, 2733 mg for epibromohydrin, 2400 mg for styrene oxide, 3000 mg for 1,2-epoxy-3-phenoxypropane, 1420 mg for glycidol) with  $\text{CO}_2$  purged at 1 MPa under solvent free environment catalyzed by the activated sample (0.005mmol, 4 mg)

and co-catalyst of tetrabutylammonium bromide (TBAB, 0.3 mmol) for different intervals. The loading of the catalyst is a 0.025% ratio based on the epoxide. After given reaction time, a small aliquot of the supernatant reaction mixtures was dissolved in 0.6 mL of CDCl<sub>3</sub>. The obtained solution was filtered through a syringe filter (PTFE) to be analyzed by <sup>1</sup>H NMR for calculating the conversion of the epoxide. For the recycle experiment, the catalyst was separated by centrifugation for 5 min after the reaction, and the supernatant was collected. The residual solid was washed with dichloromethane and centrifuged three times before being applied the next catalytic conditions.

For the recyclable experiment, the catalyst was isolated by centrifugation after the reaction, washed with dichloromethane for three times and dried in air. The recovered catalyst was reused in the following reactions under the same conditions as the first run.

#### 1.4 ICP procedure

Firstly, the filter liquor after catalytic reaction is incinerated at about 500 degrees in the ceramic crucible; secondly, the alkali is dissolved; thirdly, the acid is neutralized; finally, the solution is added to the instrument for analysis.

#### 1.5 Cycloaddition of CO<sub>2</sub> to epoxides

The conversion was calculated from <sup>1</sup>H NMR according to the following equation.

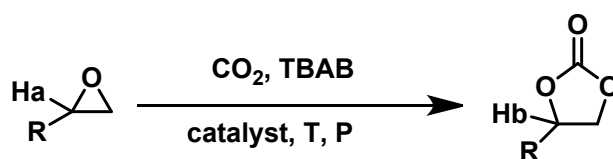

$$\text{conversion} = \frac{{}^1\text{Hb}}{({}^1\text{Ha} + {}^1\text{Hb})}$$

The TON (turnover number) and TOF (turnover frequency) were calculated according to the following equations.

$$\text{TON} = \frac{n(\text{epoxide})}{n(\text{catalyst})}$$

$$\text{TOF} = \frac{n(\text{epoxide})}{n(\text{catalyst}) \times h}$$

## S2 Supplementary tables and figures

Table S1 Crystallographic data

|                                 |                                                                     |
|---------------------------------|---------------------------------------------------------------------|
| Formula                         | Ni <sub>4</sub> SiC <sub>29</sub> O <sub>23</sub> H <sub>39</sub> N |
| $F_w$                           | 1032.47                                                             |
| Crystal system                  | orthorhombic                                                        |
| Space group                     | <i>P n m a</i>                                                      |
| <i>a</i> , Å                    | 12.260(3)                                                           |
| <i>b</i> , Å                    | 18.225(5)                                                           |
| <i>c</i> , Å                    | 19.795(5)                                                           |
| <i>V</i> , Å <sup>3</sup>       | 4423(2)                                                             |
| <i>Z</i>                        | 4                                                                   |
| $D_c$ , mg/mm <sup>3</sup>      | 1.340                                                               |
| $\mu$ , mm <sup>-1</sup>        | 1.767                                                               |
| reflection collected            | 26769                                                               |
| GOF on $F^2$                    | 1.048                                                               |
| $R_1/wR_2$ ( $I > 2\sigma(I)$ ) | 0.0588 / 0.1692                                                     |
| $R_1/wR_2$ (all data)           | 0.0765 / 0.1786                                                     |

$$R_1 = \frac{\sum ||F_o| - |F_c||}{\sum |F_o|} \quad wR_2 = \left[ \frac{\sum [w(F_o^2 - F_c^2)^2]}{\sum [w(F_o^2)]} \right]^{1/2}$$

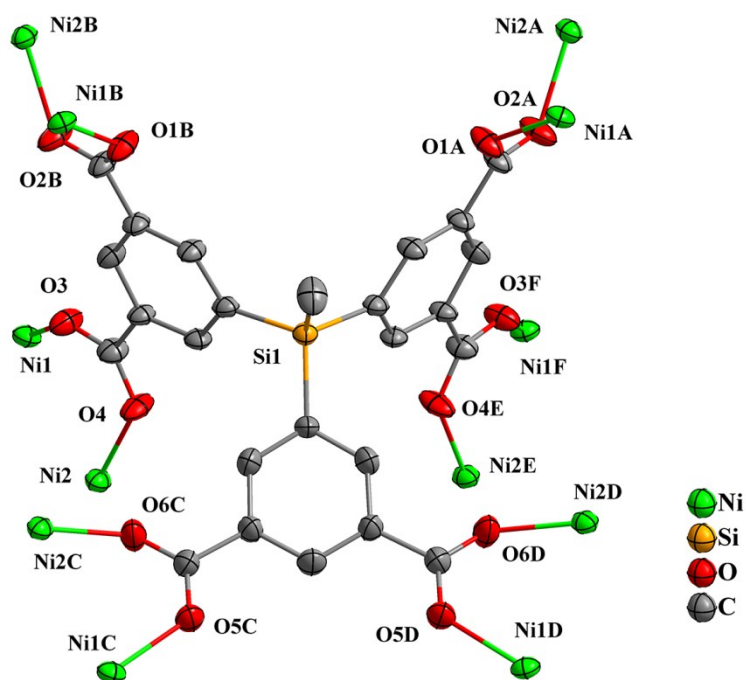

Figure S1. ORTEP representation of the asymmetric unit in **1** with thermal ellipsoids set at 50% probability. The asymmetric codes for the coordinated atoms: A,  $-0.5+x, 1.5-y, 1.5-z$ ; B,  $-0.5+x, y, 1.5-z$ ; C,  $-1+x, y, z$ ; D,  $-x, -0.5+y, 1-z$ ; E,  $1-x, -0.5+y, 1-z$ ; F,  $x, 1.5-y, z$ .

Hydrogen atoms bonded to carbon atoms are omitted for clarity.

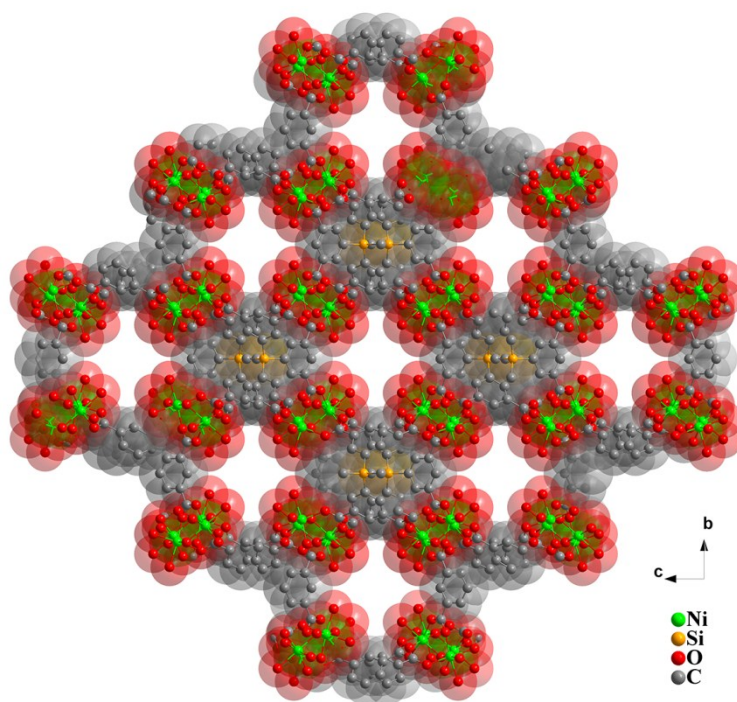

Figure S2. Space-filling view of the structure of **1** showing pores along the  $a$ -axis. For clarity the hydrogen atoms have been omitted.

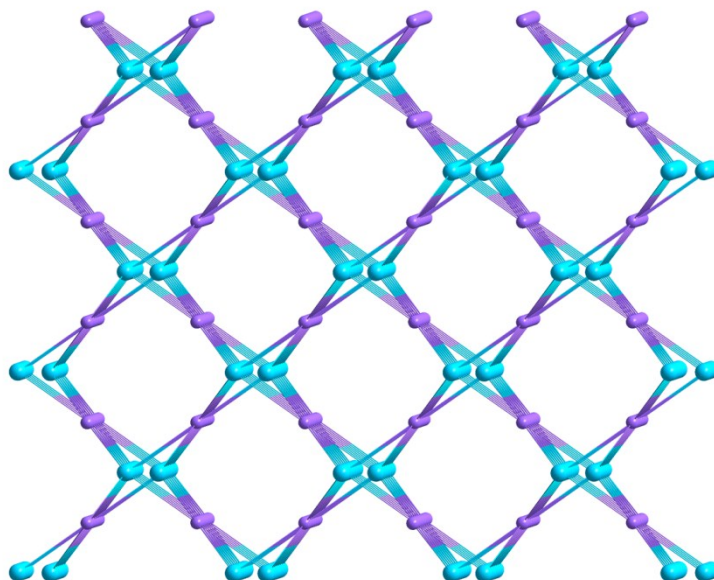

Figure S3. Simplified 6,6-connected net of the compound **1**.

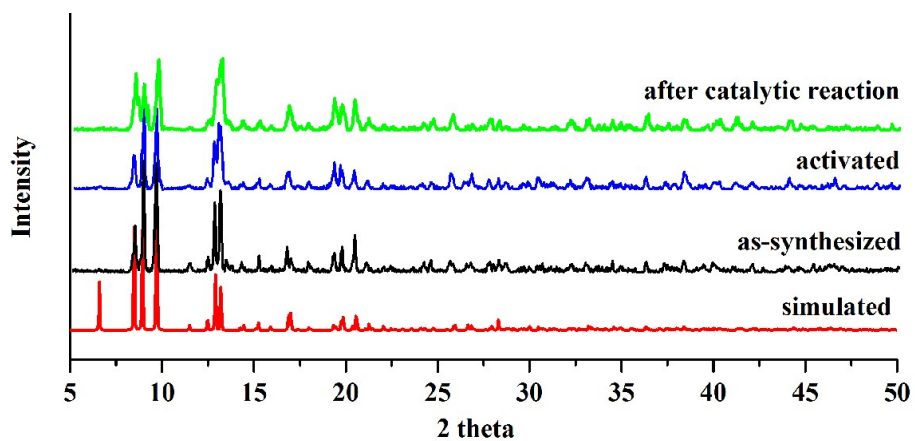

Figure S4. Powder X-ray (PXRD) patterns for the simulated, as-synthesized and activated samples of compound 1, as well as that after the catalytic reaction.

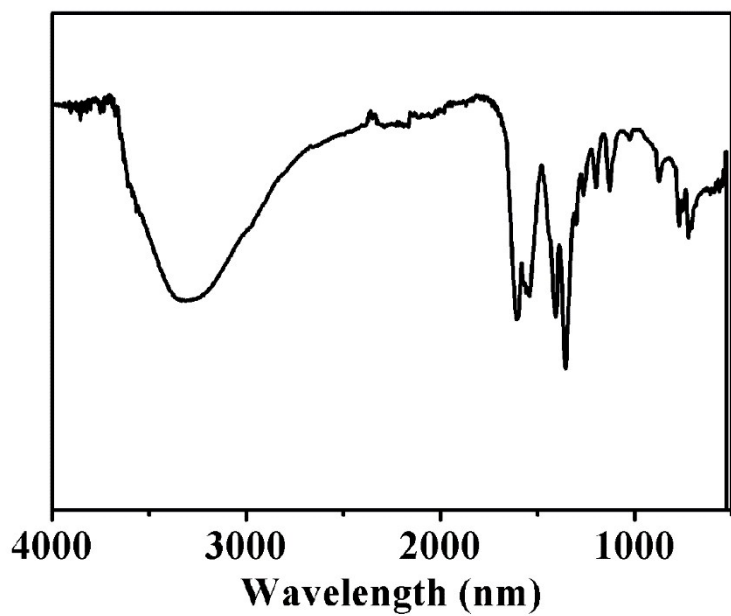

Figure S5. Infrared spectra of the compound 1.

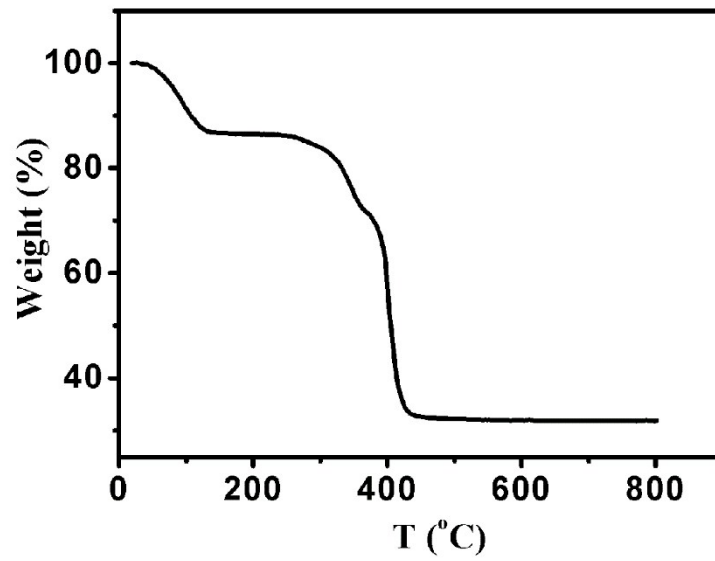

Figure S6 TG curve of compound 1.

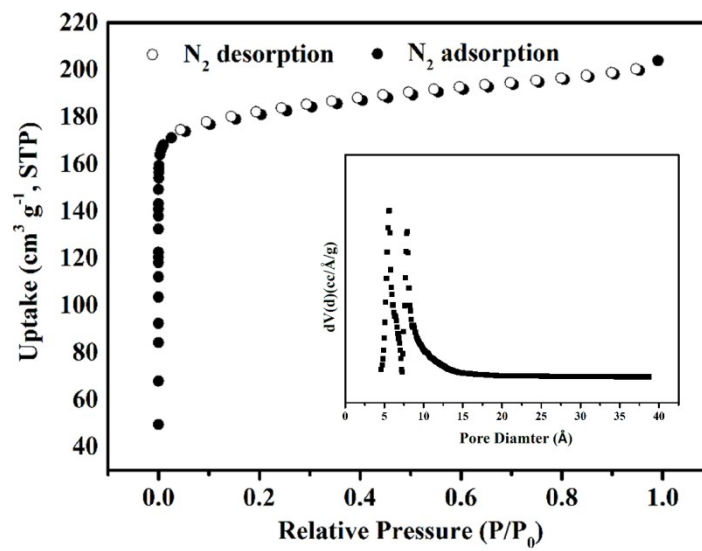

Figure S7. The N<sub>2</sub> sorption isotherm at 77K (P<sub>0</sub> = 101 KPa). Inset: the pore size distribution base on N<sub>2</sub> adsorption analysis.

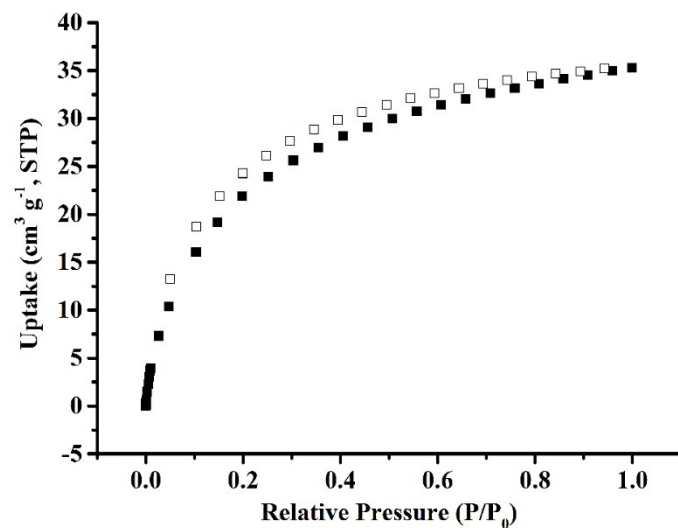

Figure S8. The CO<sub>2</sub> sorption isotherm at 273 K ( $P_0 = 101$  KPa).

The sorption behaviour of compound **1** toward CO<sub>2</sub> was studied at 273 K and under 1bar, which is reversible and do not reach the saturated adsorption. It shows a maximum CO<sub>2</sub> uptake of 35 cm<sup>3</sup> g<sup>-1</sup> at 273K.

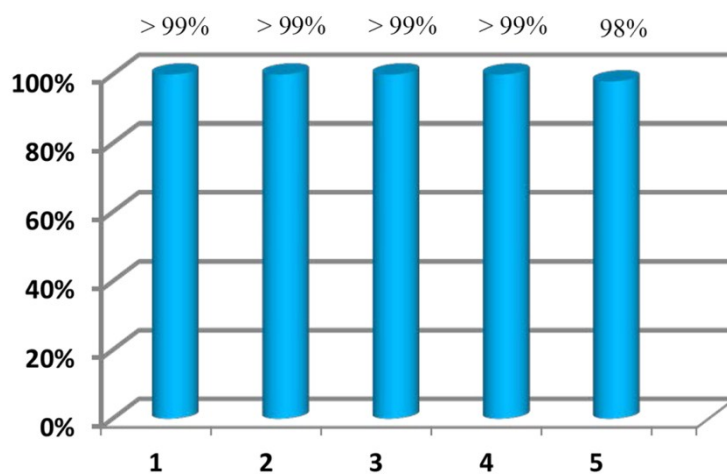

Figure S9. Histogram of recyclability study (five cycles) for catalytic activities of catalyst **1** in coupling of epichlorohydrin with CO<sub>2</sub>.



Table S2 Compound 1 catalyzed coupling of epoxides with CO<sub>2</sub>.

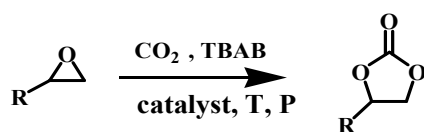

| Entry | Substrate                                                                          | Time(h) | conversion(%) | TON  | TOF  |
|-------|------------------------------------------------------------------------------------|---------|---------------|------|------|
| 1     | 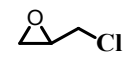  | 3       | >99           | 4000 | 1333 |
| 2     |   | 3       | >99           | 4000 | 1333 |
| 3     |   | 3       | >99           | 4000 | 1333 |
| 3     |   | 3       | 64            | 2560 | 853  |
|       |                                                                                    | 6       | 85            | 3400 | 567  |
|       |                                                                                    | 9       | >99           | 4000 | 444  |
| 4     |  | 3       | 28            | 1120 | 373  |
|       |                                                                                    | 6       | 50            | 2000 | 333  |
|       |                                                                                    | 9       | 59            | 2360 | 262  |
|       |                                                                                    | 12      | 68            | 2720 | 227  |

Reaction conditions: epoxide (20 mmol), catalyst (0.005 mmol, based on [Ni<sub>4</sub>] cluster), and TBAB (0.3 mmol) under carbon dioxide (1 MPa) at 373 K. The yields were determined by <sup>1</sup>H NMR analysis.

Table S3 Comparison with different MOF catalysts in the cycloaddition reaction of CO<sub>2</sub> and the same epoxies under similar conditions.

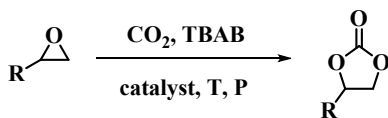

| Substrate                                                                           | Catalyst                                          | T (°C) | P (MPa) | T (h) | TON   | TOF (h <sup>-1</sup> ) | Ref.      |
|-------------------------------------------------------------------------------------|---------------------------------------------------|--------|---------|-------|-------|------------------------|-----------|
| 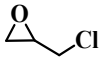   | Gea-MOF-1                                         | 120    | 2.0     | 6     | 593   | 99                     | 3         |
|                                                                                     | CHB(M)                                            | 120    | 1.2     | 6     | 44.6  | 7                      | 4         |
|                                                                                     | Ni(salphen)-MOF                                   | 80     | 2.0     | 4     | 300   | 75                     | 5         |
|                                                                                     | [Cu <sub>2</sub> L]                               | 100    | 1.0     | 2     | 1904  | 952                    | 6         |
|                                                                                     | {Ni <sub>4</sub> L(OH) <sub>2</sub> }             | 100    | 1.0     | 3     | 4000  | 1333                   | This work |
|  | {[Eu(BTB)(phen)]}                                 | 70     | 0.1     | 12    | 19.6  | 1.6                    | 7         |
|                                                                                     | [Cu <sub>2</sub> L]                               | 100    | 1.0     | 2     | 2000  | 1000                   | 6         |
|                                                                                     | {Ni <sub>4</sub> L(OH) <sub>2</sub> }             | 100    | 1.0     | 3     | 4000  | 1333                   | This work |
|  | [Cu <sub>4</sub> (L <sub>1</sub> ) <sub>n</sub> ] | 25     | 0.1     | 48    | 440.0 | 9.2                    | 8         |
|                                                                                     | {Ni <sub>4</sub> L(OH) <sub>2</sub> }             | 100    | 1.0     | 3     | 4000  | 1333                   | This work |
|  | Ni-TCPE-1                                         | 100    | 1.0     | 12    | 2000  | 167                    | 9         |
|                                                                                     | Ni-TCPE-2                                         | 100    | 1.0     | 12    | 1720  | 143                    | 9         |
|                                                                                     | Gea-MOF-1                                         | 120    | 2.0     | 6     | 567   | 95                     | 3         |
|                                                                                     | L <sub>cu'</sub>                                  | 120    | 2.0     | 4     | 289   | 72                     | 10        |
|                                                                                     | {Ni <sub>4</sub> L(OH) <sub>2</sub> }             | 100    | 1.0     | 12    | 2680  | 223                    | This work |
|  | Ni-TCPE-1                                         | 100    | 1.0     | 12    | 2000  | 167                    | 9         |
|                                                                                     | Ni(salphen)-MOF                                   | 80     | 2.0     | 4     | 196   | 49                     | 5         |
|                                                                                     | CHB(M)                                            | 120    | 1.2     | 6     | 44    | 7                      | 4         |
|                                                                                     | {Ni <sub>4</sub> L(OH) <sub>2</sub> }             | 100    | 1.0     | 9     | 4000  | 444                    | This work |

Table S4 The time-control experiments conducted in coupling of CO<sub>2</sub> with a large excess of epichlorohydrin. Reaction condition: epichlorohydrin (120 mmol), catalyst (0.005 mmol, 0.0042 % based on the catalyst) and TBAB (0.3 mmol) under carbon dioxide (1 MPa) at 373 K. The conversion was determined by <sup>1</sup>H NMR analysis.

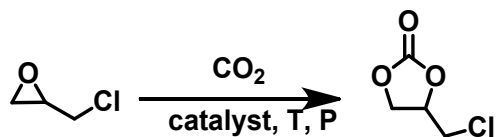

| Entry | Catalyst                              | Co-catalyst | T (K) | P (MPa) | Time (h) | Yield (%) |
|-------|---------------------------------------|-------------|-------|---------|----------|-----------|
| 1     | {Ni <sub>4</sub> L(OH) <sub>2</sub> } | TBAB        | 373   | 1       | 6        | 84        |
| 2     | {Ni <sub>4</sub> L(OH) <sub>2</sub> } | TBAB        | 373   | 1       | 10       | 91        |
| 3     | {Ni <sub>4</sub> L(OH) <sub>2</sub> } | TBAB        | 373   | 1       | 14       | >99       |

### S3 The NMR spectrums

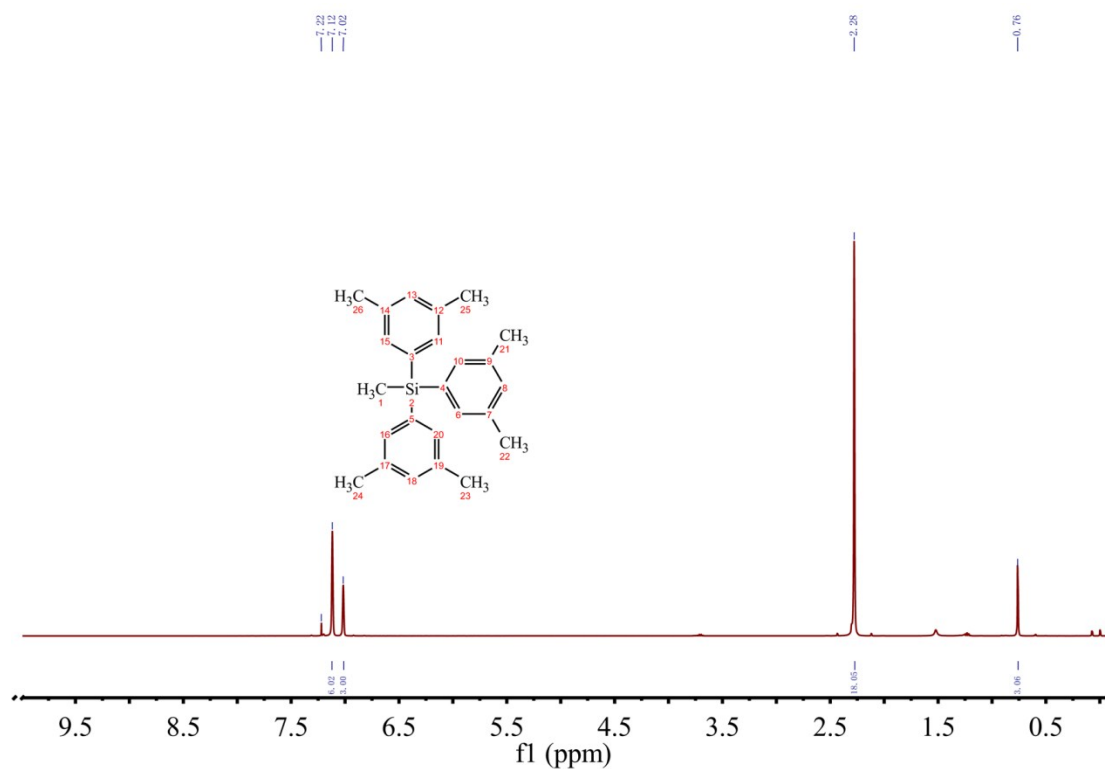

Figure S10. The <sup>1</sup>H-NMR spectrum of tris(3,5-dimethylphenyl)(methyl)silane

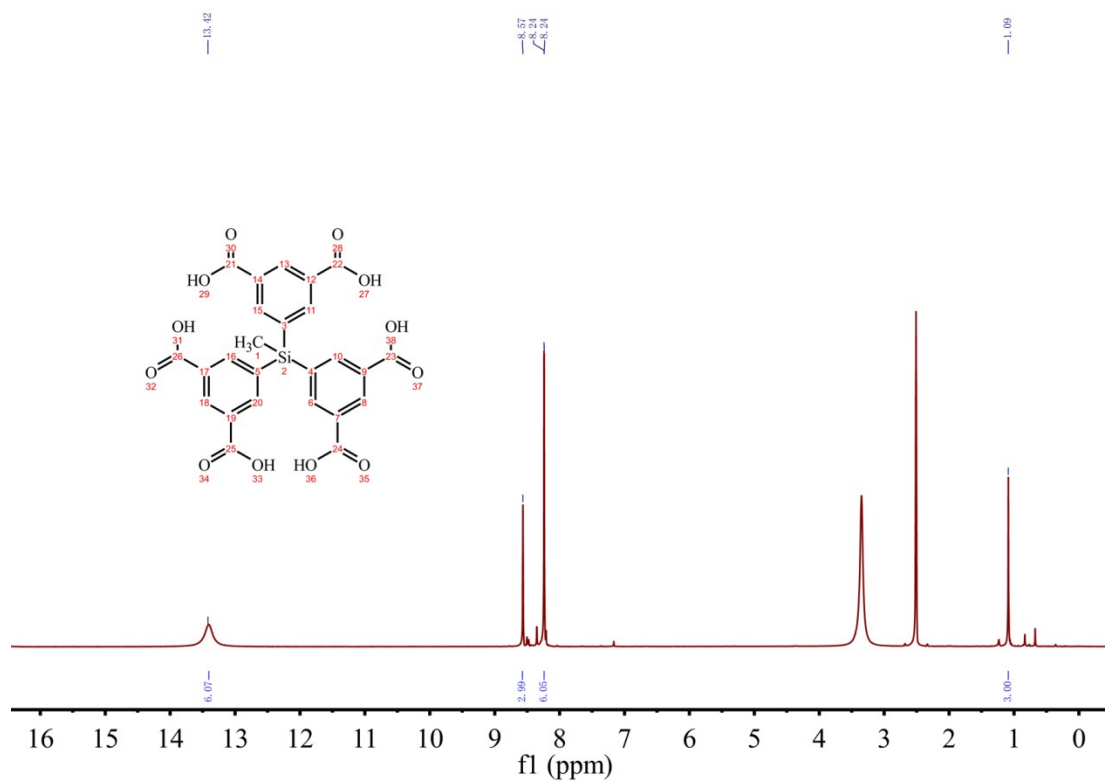

Figure S11. The <sup>1</sup>H-NMR spectrum of 5,5',5''-(methylsilanetriyl)trisophthalic acid.

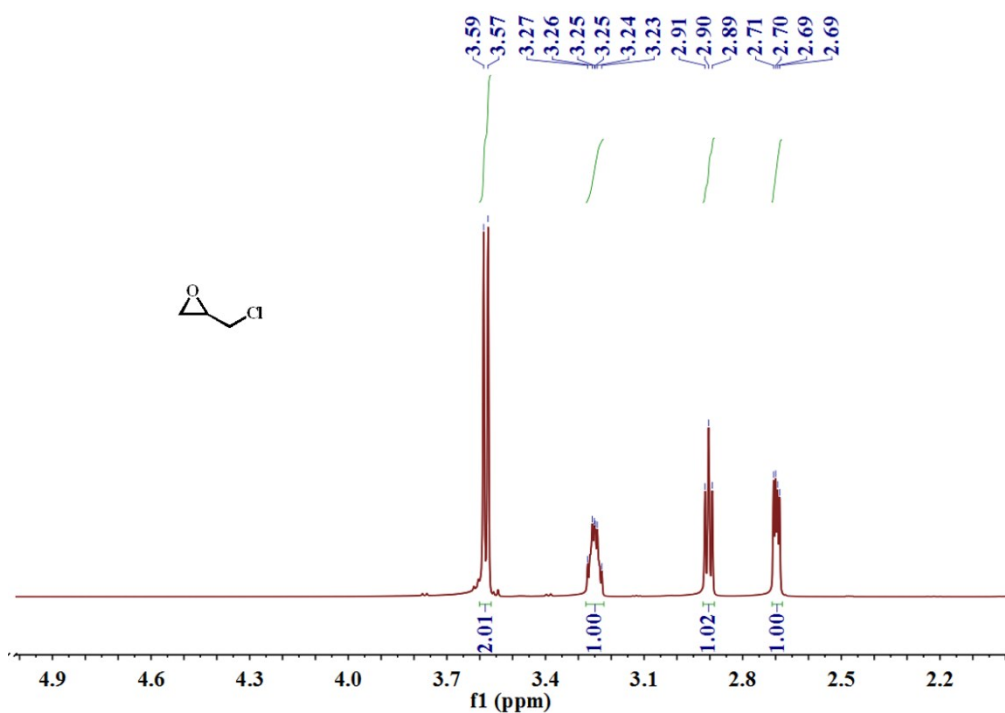

Figure S12  $^1\text{H}$  NMR spectra of epichlorohydrin (400 MHz,  $\text{CDCl}_3$ ):  $\delta = 3.58$  (d,  $J = 8.0$  Hz, 2H, Cl- $\text{CH}_2$ ), 3.23 – 3.27 (m, 1H, O-CH), 2.90 (t,  $J = 4.0$  Hz, 1H, O- $\text{CH}_2$ ), 2.70 (q,  $J = 4.0$  Hz, 1H, O- $\text{CH}_2$ ).

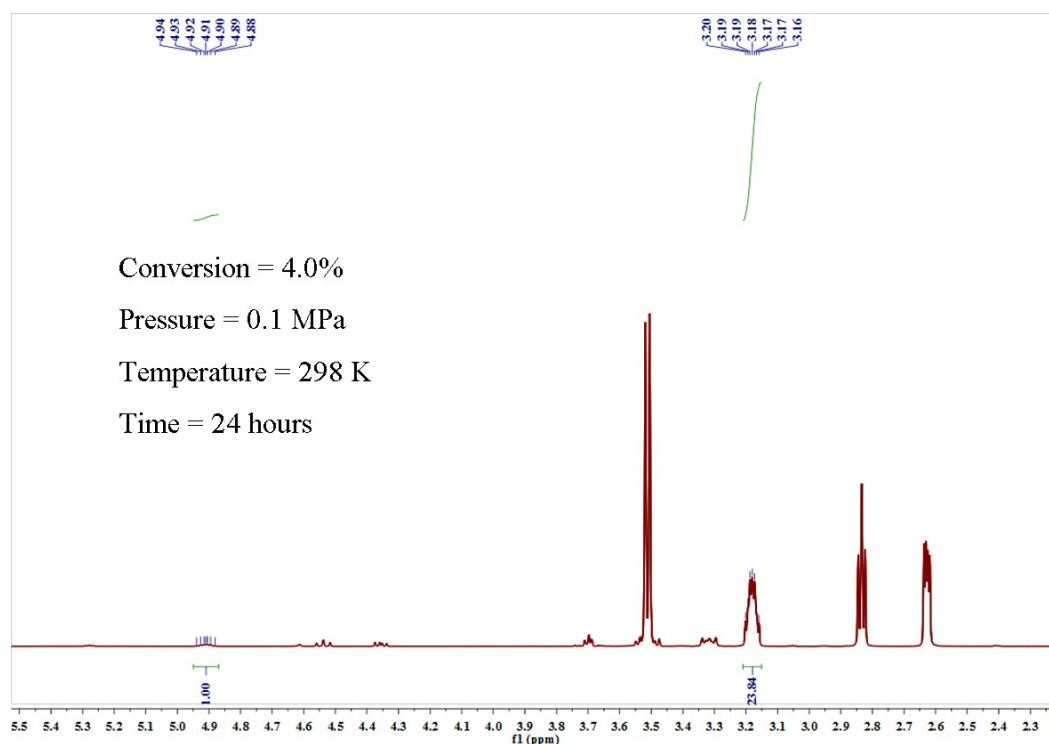

Figure S13.  $^1\text{H}$  NMR spectra of the cycloaddition product of epichlorohydrin and  $\text{CO}_2$  (400 MHz,  $\text{CDCl}_3$ ):  $\delta = 4.88 - 4.93$  (m, 1H, COO-CH), 4.53 (t,  $J = 8.0$  Hz, 1H, COO- $\text{CH}_2$ ), 4.35 (q,  $J = 8.0$  Hz, 1H, COO- $\text{CH}_2$ ), 3.65 – 3.74 (m, 1H, Cl- $\text{CH}_2$  of product), 3.50–3.52 (m, 0.10 H, Cl- $\text{CH}_2$  of chloromethyl-cyclopropane), 3.16 – 3.20 (m, 1H, O- $\text{CH}_2$ ), 2.83 (d,  $J = 4.0$  Hz, 1H, O- $\text{CH}_2$ ), 2.63 (q,  $J = 4.0$  Hz, 1H, O- $\text{CH}_2$ ).

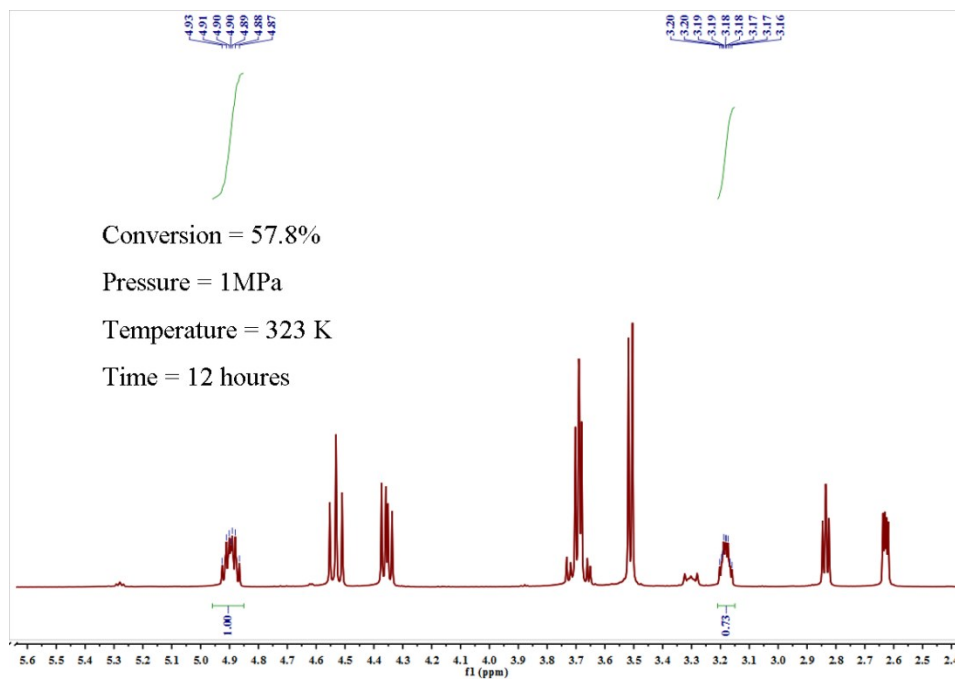

Figure S14  $^1\text{H}$  NMR spectra of the cycloaddition product of epichlorohydrin and  $\text{CO}_2$  (400 MHz,  $\text{CDCl}_3$ )

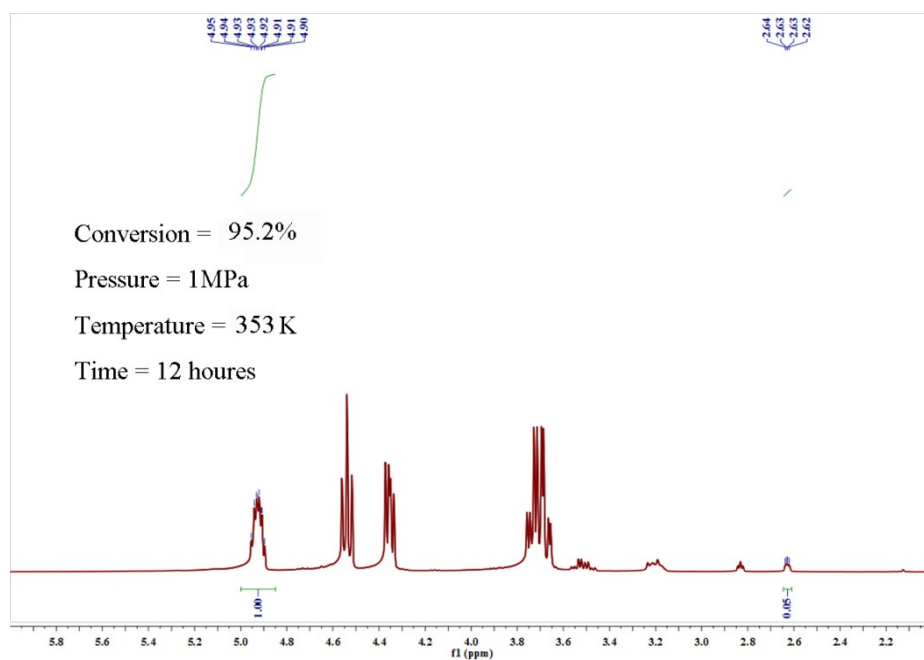

Figure S15  $^1\text{H}$  NMR spectra of the cycloaddition product of epichlorohydrin and  $\text{CO}_2$  (400 MHz,  $\text{CDCl}_3$ )

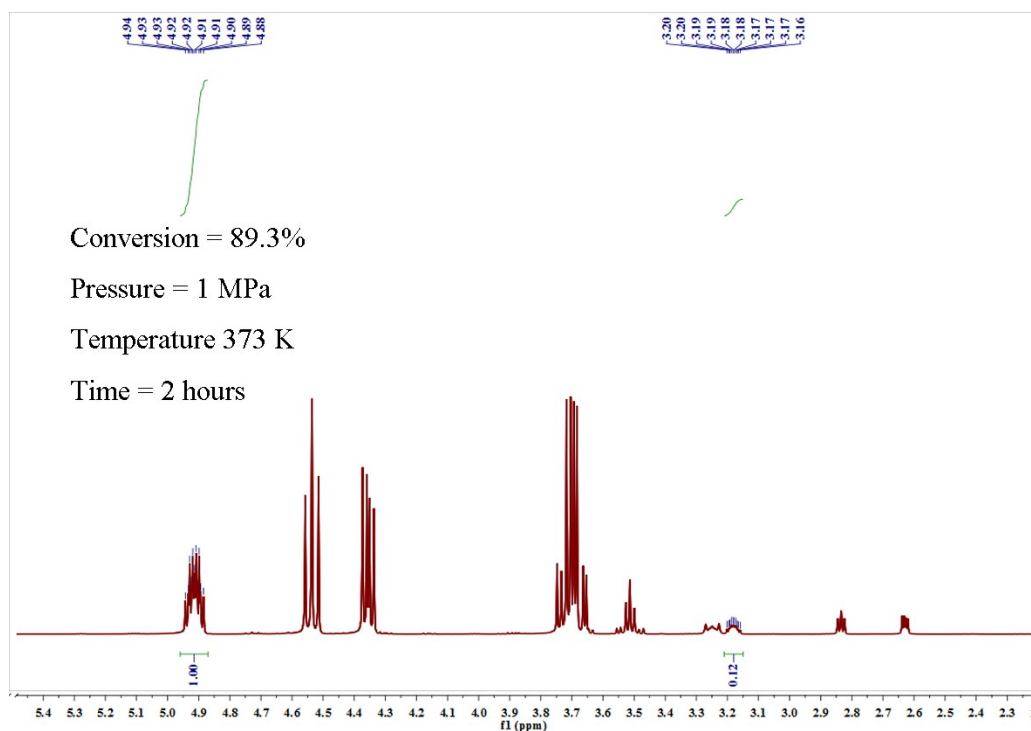

Figure S16  $^1\text{H}$  NMR spectra of the cycloaddition product of epichlorohydrin and  $\text{CO}_2$  (400 MHz,  $\text{CDCl}_3$ )

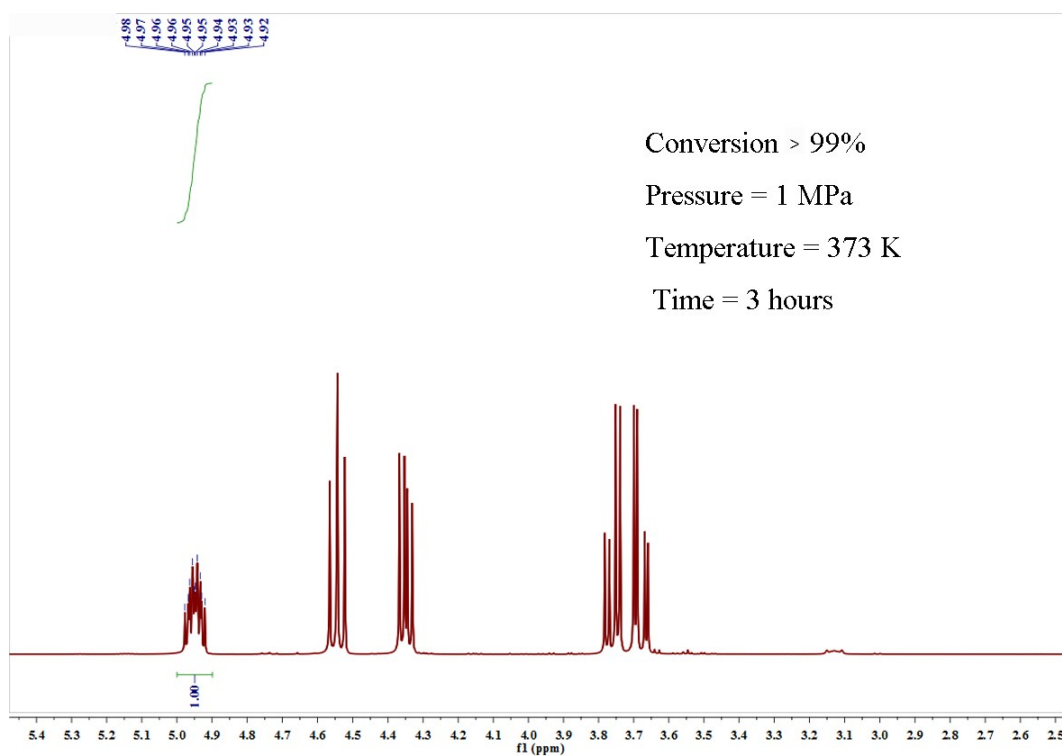

Figure S17  $^1\text{H}$  NMR spectra of the cycloaddition product of epichlorohydrin and  $\text{CO}_2$  (400 MHz,  $\text{CDCl}_3$ )

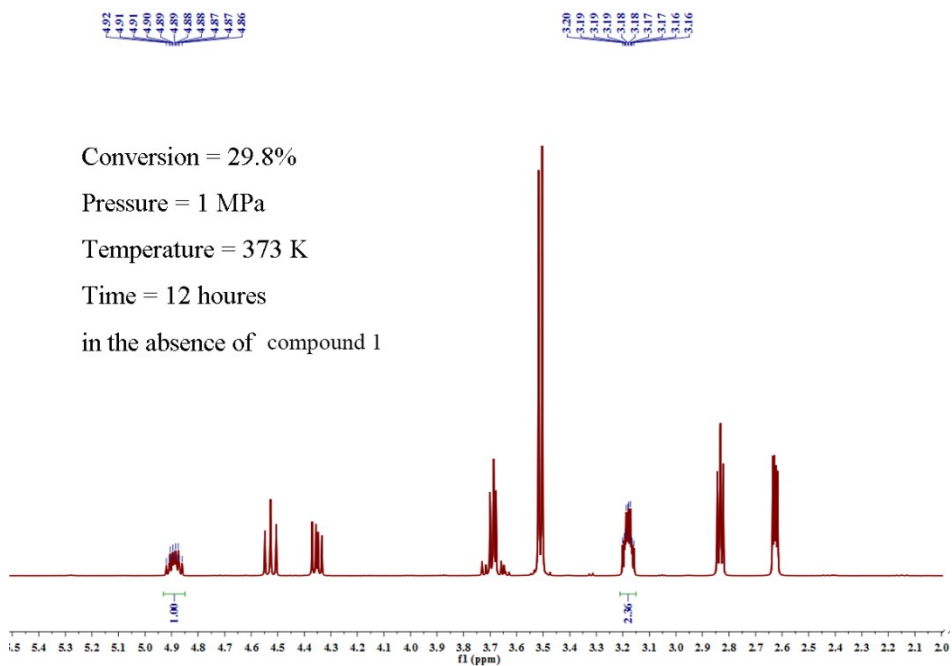

Figure S18  $^1\text{H}$  NMR spectra of the cycloaddition product of epichlorohydrin and  $\text{CO}_2$  (400 MHz,  $\text{CDCl}_3$ )

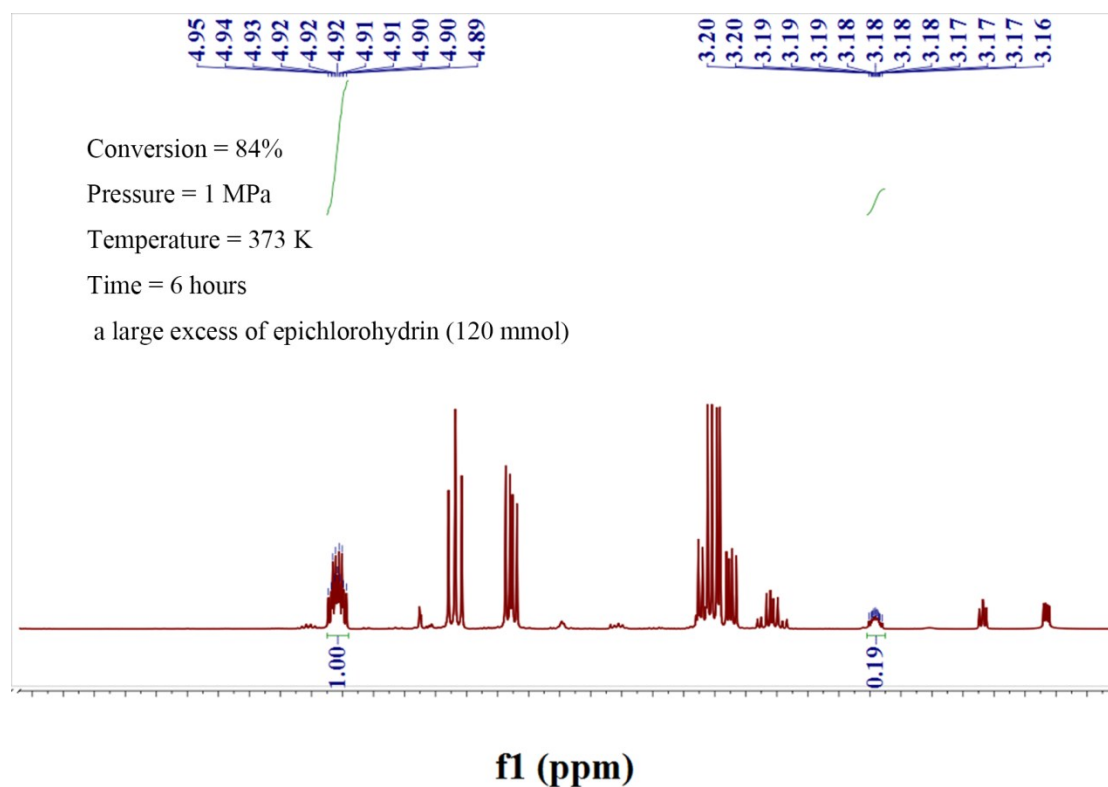

Figure S19.  $^1\text{H}$  NMR spectra of the cycloaddition product of epichlorohydrin and  $\text{CO}_2$  (400 MHz,  $\text{CDCl}_3$ )



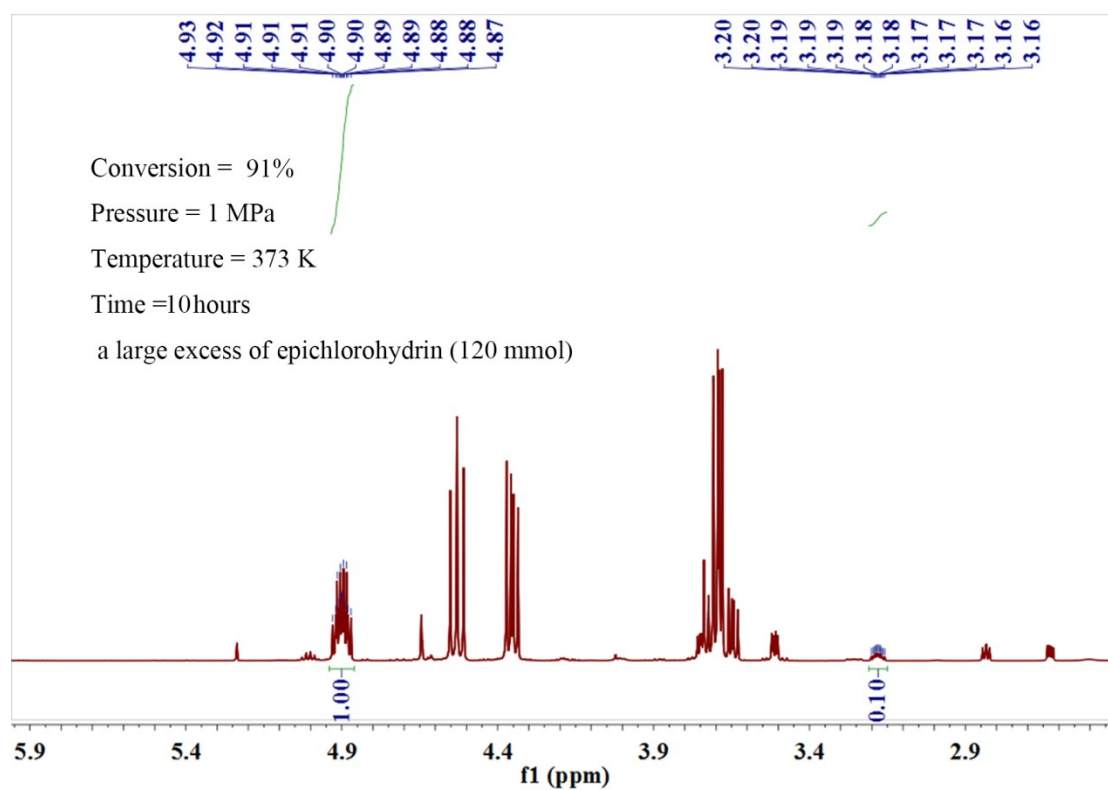

Figure S20.  $^1\text{H}$  NMR spectra of the cycloaddition product of epichlorohydrin and  $\text{CO}_2$  (400 MHz,  $\text{CDCl}_3$ )

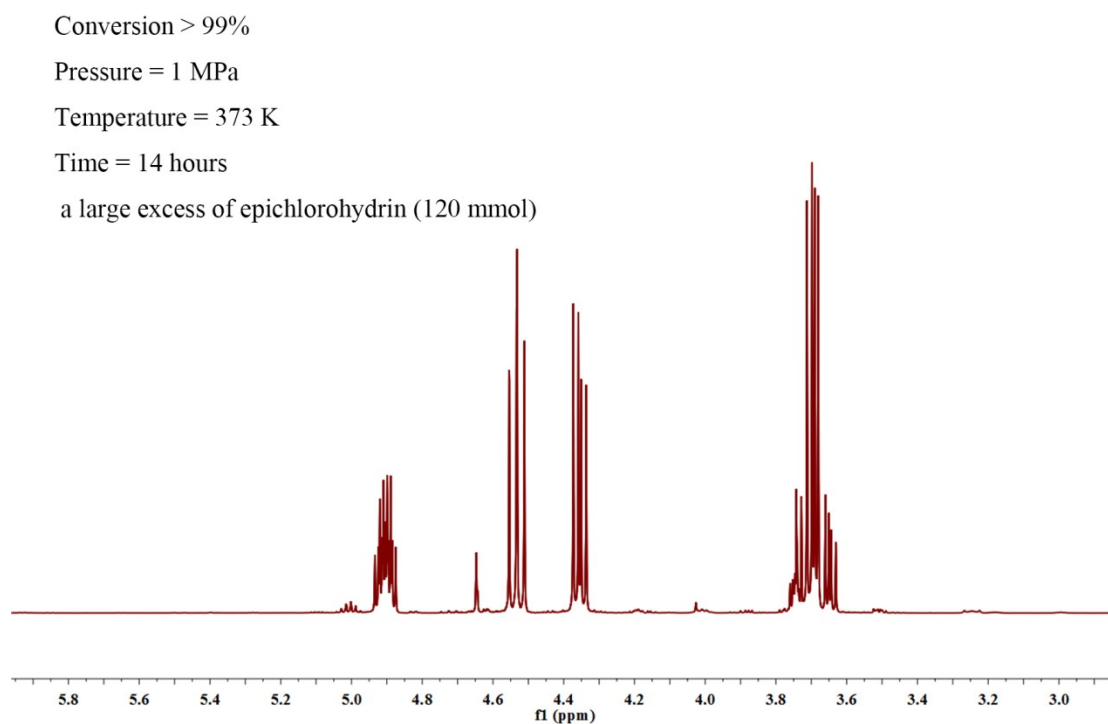

Figure S21.  $^1\text{H}$  NMR spectra of the cycloaddition product of epichlorohydrin and  $\text{CO}_2$  (400 MHz,  $\text{CDCl}_3$ ).

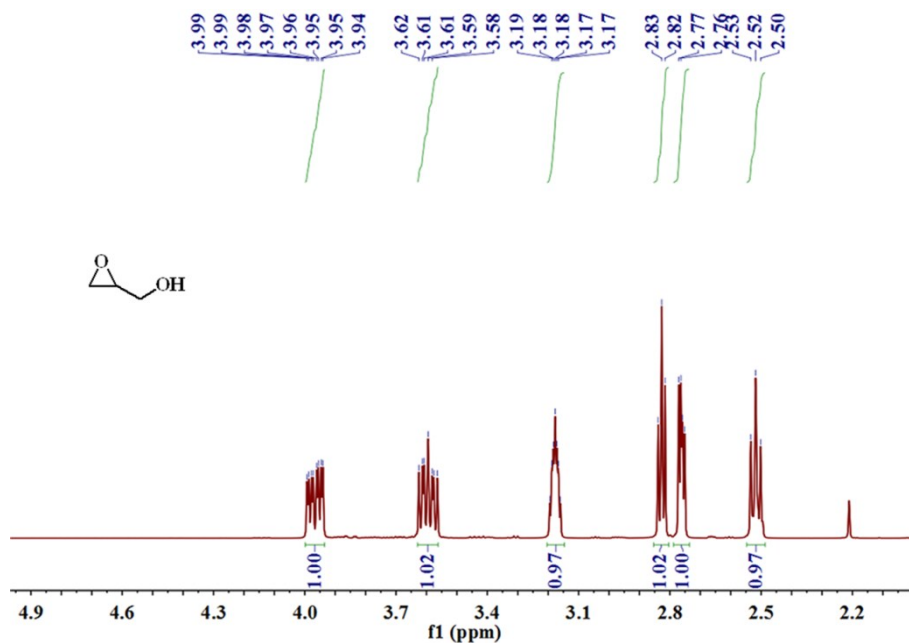

Figure S22.  $^1\text{H}$  NMR spectra of glycidol (400 MHz,  $\text{CDCl}_3$ ):  $\delta = 3.94 - 3.99$  (m, 1H, HO- $\text{CH}_2$ ), 3.56 - 3.62 (m, 1H, HO- $\text{CH}_2$ ), 3.16 - 3.19 (m, 1H, O-CH), 2.83 (t,  $J = 4.0$  Hz, 1H, O- $\text{CH}_2$ ), 2.76 (q,  $J = 4.0$  Hz, 1H, O- $\text{CH}_2$ ), 2.52 (t,  $J = 4.0$  Hz, 1H, -OH).

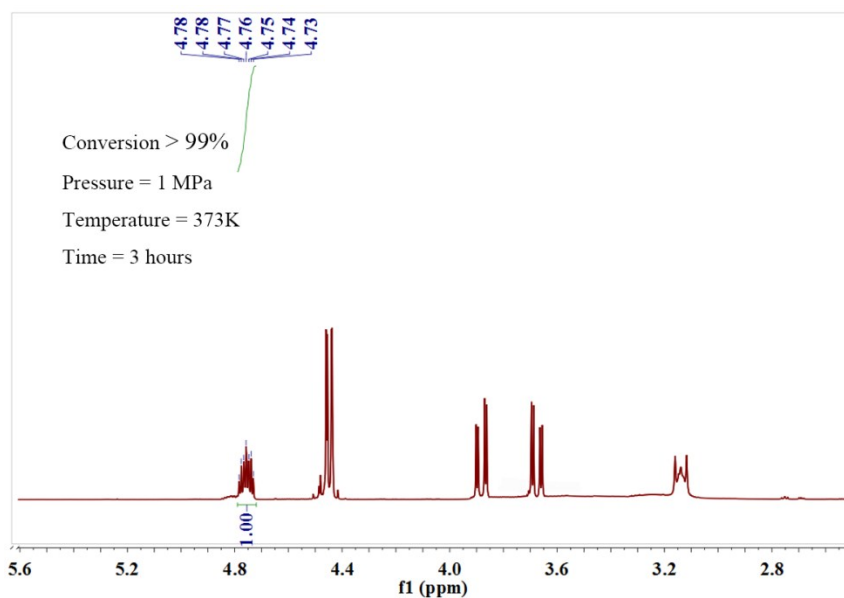

Figure S23.  $^1\text{H}$  NMR spectra of the cycloaddition product of cyclopropyl-methanol with  $\text{CO}_2$  (400 MHz,  $\text{CDCl}_3$ ):  $\delta = 4.73 - 4.78$  (m, 1H, COO-CH), 4.39 - 4.48 (m, 2H, HO- $\text{CH}_2$ ), 3.91 (dd,  $J = 12.0$  Hz, 4.0 Hz, 1H, COO- $\text{CH}_2$ ), 3.65 (dd,  $J = 12.0, 4.0$  Hz, 1H, COO- $\text{CH}_2$ ), 2.73 (br, 1H, -OH).

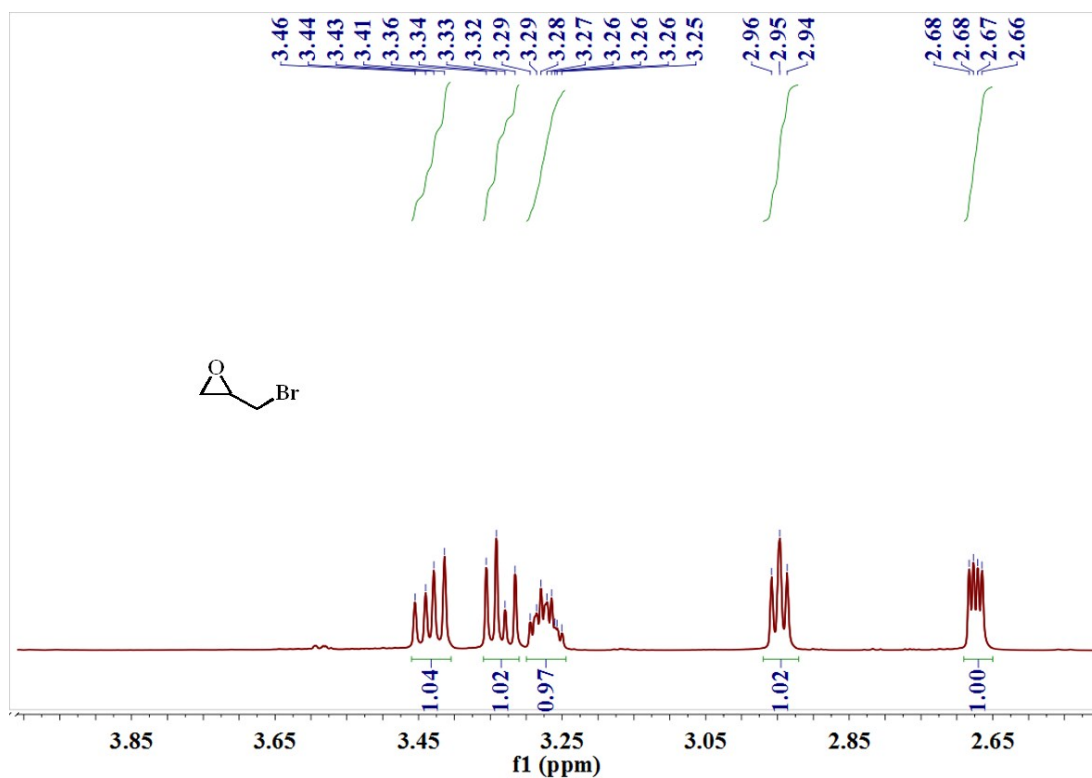

Figure S24.  $^1\text{H}$  NMR spectra of epibromohydrin (400 MHz,  $\text{CDCl}_3$ ):  $\delta = 3.42$  (q,  $J = 8.0$  Hz, 1H, Br- $\text{CH}_2$ ), 3.33 (q,  $J = 8.0$  Hz, 1H, Br- $\text{CH}_2$ ), 3.25 – 3.29 (m, 1H, O- $\text{CH}^*$ ), 2.95 (t,  $J = 4.0$  Hz, 1H, O- $\text{CH}_2$ ), 2.67 (q,  $J = 4.0$  Hz, 1H, O- $\text{CH}_2$ ).

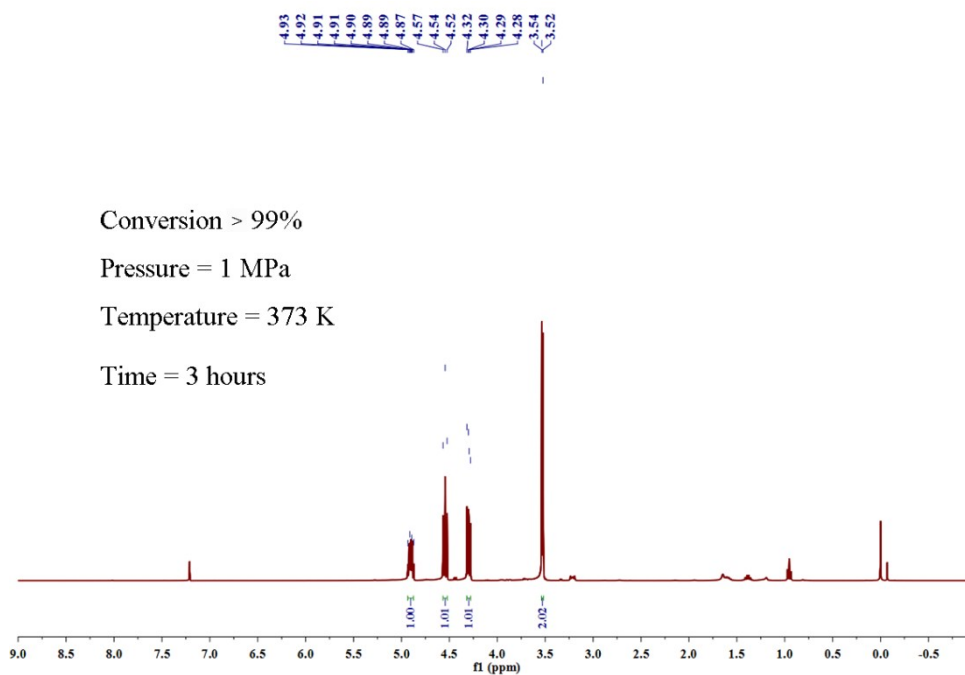

Figure S25.  $^1\text{H}$  NMR spectra of the cycloaddition product of epibromohydrin and  $\text{CO}_2$  for 3h (400 MHz,  $\text{CDCl}_3$ ):  $\delta = 4.88 - 4.95$  (m, 1H, COO- $\text{CH}^*$  of product).

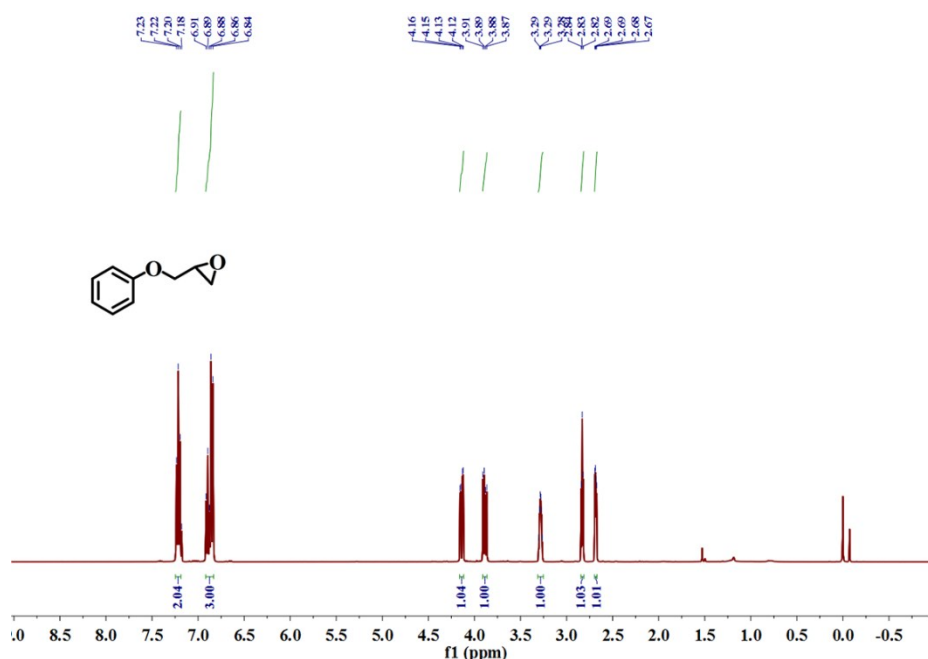

Figure S26.  $^1\text{H}$  NMR spectra of 1,2-epoxy-3-phenoxypropane (400 MHz,  $\text{CDCl}_3$ ) :  $\delta = 7.18 - 7.23$  (m, 2H, Ar-H), 6.84 – 6.91 (m, 3H, Ar-H), 4.14 (q,  $J = 4.0$  Hz, 1H, ArO-CH<sub>2</sub>), 3.88 (q,  $J = 4.0$  Hz, 1H, ArO-CH<sub>2</sub>), 3.26 – 3.30 (m, 1H, O-CH), 2.83 (t,  $J = 4.0$  Hz, 1H, O-CH<sub>2</sub>), 2.68 (q,  $J = 4.00$  Hz, 1H, O-CH<sub>2</sub>).

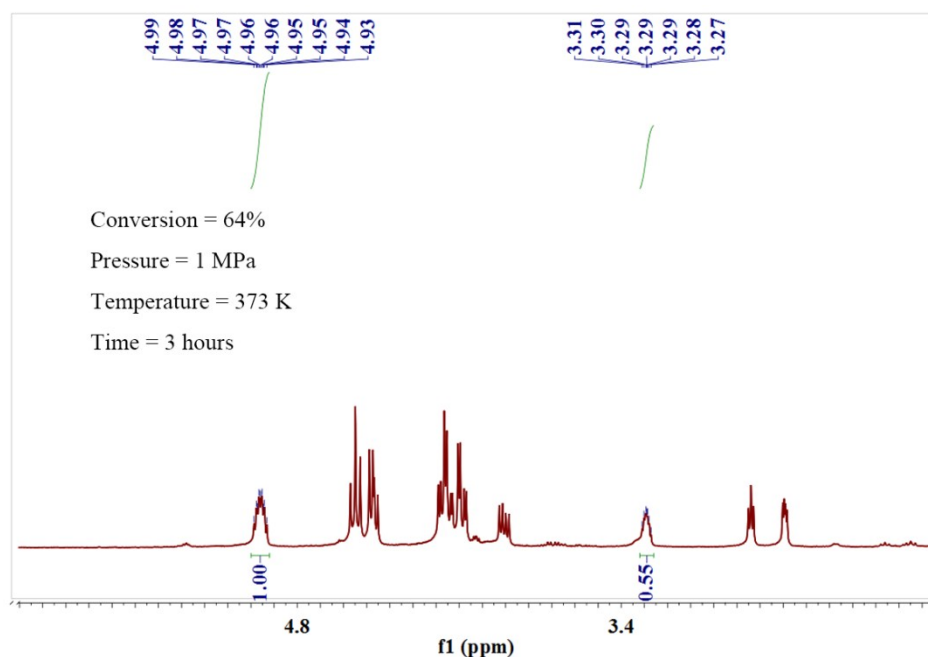

Figure S27.  $^1\text{H}$  NMR of the cycloaddition product of 1,2-epoxy-3-phenoxypropane and  $\text{CO}_2$  for 2h (400 MHz,  $\text{CDCl}_3$ ):  $\delta = 7.20 - 7.27$  (m, 3.12H, Ar-H), 6.88 – 6.97 (m, 1.47H, Ar-H), 6.83 – 6.87 (m, 2.79H, Ar-H), 4.93 – 4.99 (m, 1H, COO-CH), 4.55 (t,  $J = 8.0$  Hz, 1H, COO-CH<sub>2</sub>), 4.47 (t,  $J = 8.0$  Hz, 1H, COO-CH<sub>2</sub>), 4.19 – 4.13 (m, 1.46H, 1H - ArO-CH<sub>2</sub> of product and 0.46H - ArO-CH<sub>2</sub> of 1,2-epoxy-3-phenoxypropane), 4.07 (dd,  $J = 8.0$  Hz, 4.0 Hz, 1H, ArO-CH<sub>2</sub> of product), 3.90 (q,  $J = 8.0$  Hz, 0.46H, ArO-CH<sub>2</sub> of 1,2-epoxy-3-phenoxypropane), 3.28 – 3.31 (m, 0.46H, O-CH), 2.84 (t,  $J = 4.0$  Hz, 0.46H, O-CH<sub>2</sub>), 2.70 (q,  $J = 4.0$  Hz, 0.46H, O-CH<sub>2</sub>).

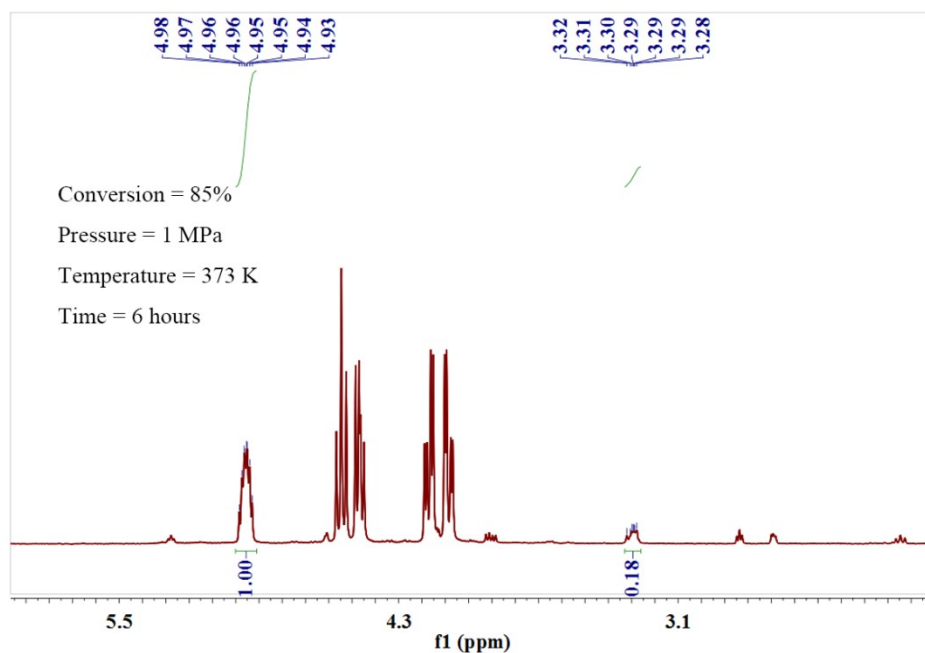

Figure S28.  $^1\text{H}$  NMR of the cycloaddition product of 1,2-epoxy-3-phenoxypropane and  $\text{CO}_2$  for 2h (400 MHz,  $\text{CDCl}_3$ ):  $\delta = 7.20 - 7.27$  (m, 3.12H, Ar-H), 6.88 – 6.97 (m, 1.47H, Ar-H), 6.83 – 6.87 (m, 2.79H, Ar-H), 4.93 – 4.99 (m, 1H, COO-CH), 4.55 (t,  $J = 8.0$  Hz, 1H, COO- $\text{CH}_2$ ), 4.47 (t,  $J = 8.0$  Hz, 1H, COO- $\text{CH}_2$ ), 4.19 – 4.13 (m, 1.46H, 1H - ArO- $\text{CH}_2$  of product and 0.46H - ArO- $\text{CH}_2$  of 1,2-epoxy-3-phenoxypropane), 4.07 (dd,  $J = 8.0$  Hz, 4.0 Hz, 1H, ArO- $\text{CH}_2$  of product), 3.90 (q,  $J = 8.0$  Hz, 0.46H, ArO- $\text{CH}_2$  of 1,2-epoxy-3-phenoxypropane), 3.28 – 3.31 (m, 0.46H, O-CH), 2.84 (t,  $J = 4.0$  Hz, 0.46H, O- $\text{CH}_2$ ), 2.70 (q,  $J = 4.0$  Hz, 0.46H, O- $\text{CH}_2$ ).

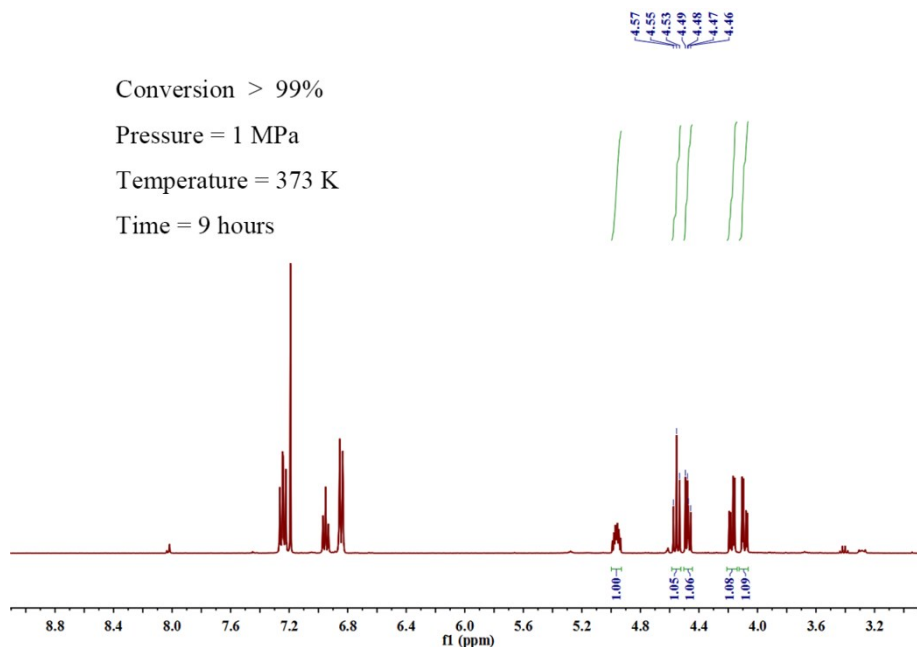

Figure S29  $^1\text{H}$  NMR spectra of the cycloaddition product of 1,2-epoxy-3-phenoxypropane and  $\text{CO}_2$  for 6h (400 MHz,  $\text{CDCl}_3$ ):  $\delta = 7.24$  (t,  $J = 8.0$  Hz, 2H, Ar-H), 6.95 (t,  $J = 8.0$  Hz, 1H, Ar-H), 6.84 (d,  $J = 8.0$  Hz, 2H, Ar-H), 4.94 – 4.99 (m, 1H, COO-CH), 4.55 (t,  $J = 8.0$  Hz, 1H, COO- $\text{CH}_2$ ), 4.48 (t,  $J = 8.0$  Hz, 1H, COO- $\text{CH}_2$ ), 4.18 (dd,  $J = 8.0$  Hz, 4.0 Hz, 1H, ArO- $\text{CH}_2$  of product), 4.08 (dd,  $J = 8.0$  Hz, 4.0 Hz, 1H, ArO- $\text{CH}_2$  of product).

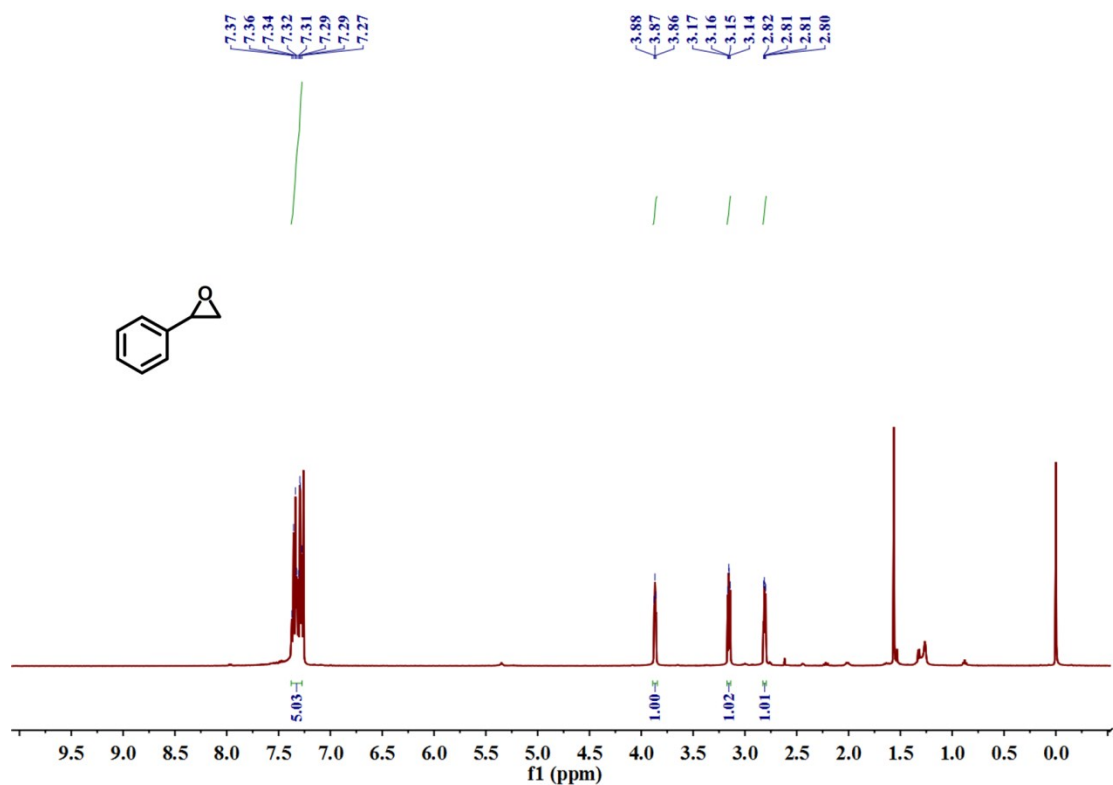

Figure S30.  $^1\text{H}$  NMR spectra of styrene oxide (400 MHz,  $\text{CDCl}_3$ ):  $\delta = 7.27 - 7.37$  (m, 5H, Ar-H), 3.87 (t,  $J=4.0$  Hz, 1H, O-CH), 3.16 (q,  $J=4.0$  Hz, 1H, O- $\text{CH}_2$ ), 2.81 (q,  $J = 4.0$  Hz, 1H, O- $\text{CH}_2$ ).

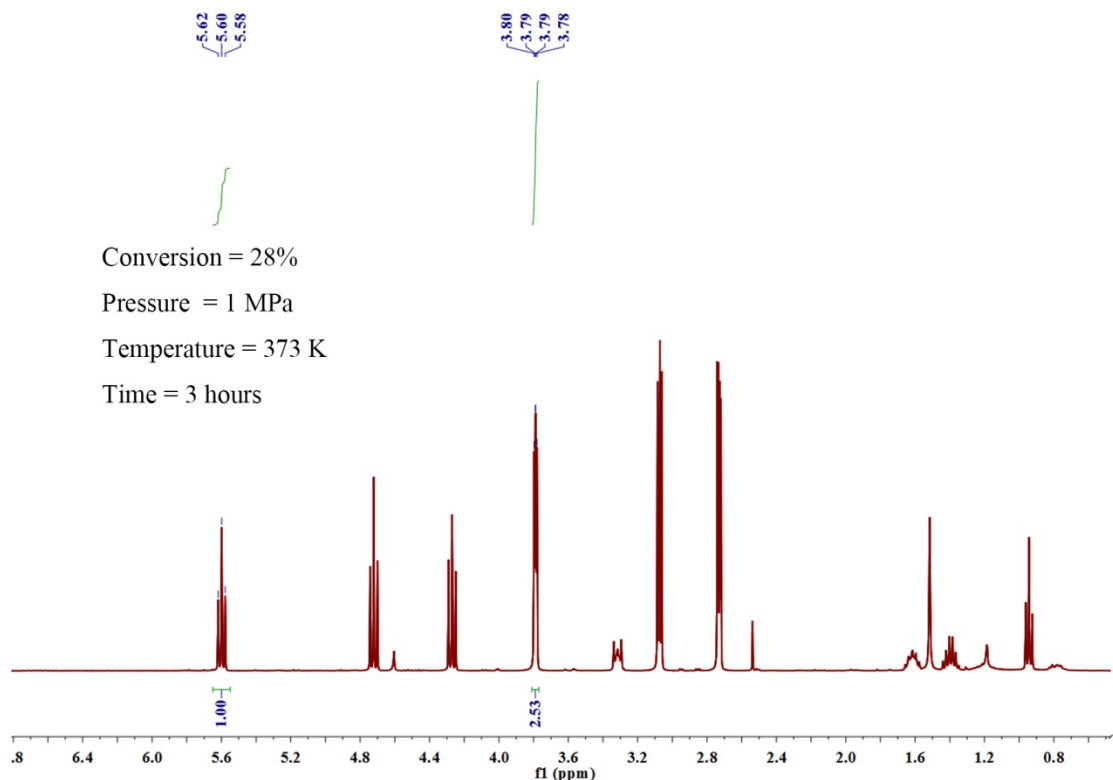

Figure S31.  $^1\text{H}$  NMR spectra of the cycloaddition product of styrene oxide and  $\text{CO}_2$  for 4h (400 MHz,  $\text{CDCl}_3$ ):  $\delta = 7.29 - 7.38$  (m, 5H, Ar-H), 7.19 - 7.26 (m, 2.58H, Ar-H), 5.60 (t,  $J = 8.0$  Hz, 1H, COO-CH), 4.73 (t,  $J = 8.0$  Hz, 1H, COO- $\text{CH}_2$ ), 4.27 (t,  $J = 8.0$  Hz, 1H, COO- $\text{CH}_2$ ), 3.79 (q,  $J = 4.0$  Hz, 0.70H, O-CH), 3.08 (q,  $J = 4.0$  Hz, 0.70H, O- $\text{CH}_2$ ), 2.73 (q,  $J = 4.0$  Hz, 0.70H, O- $\text{CH}_2$ ).

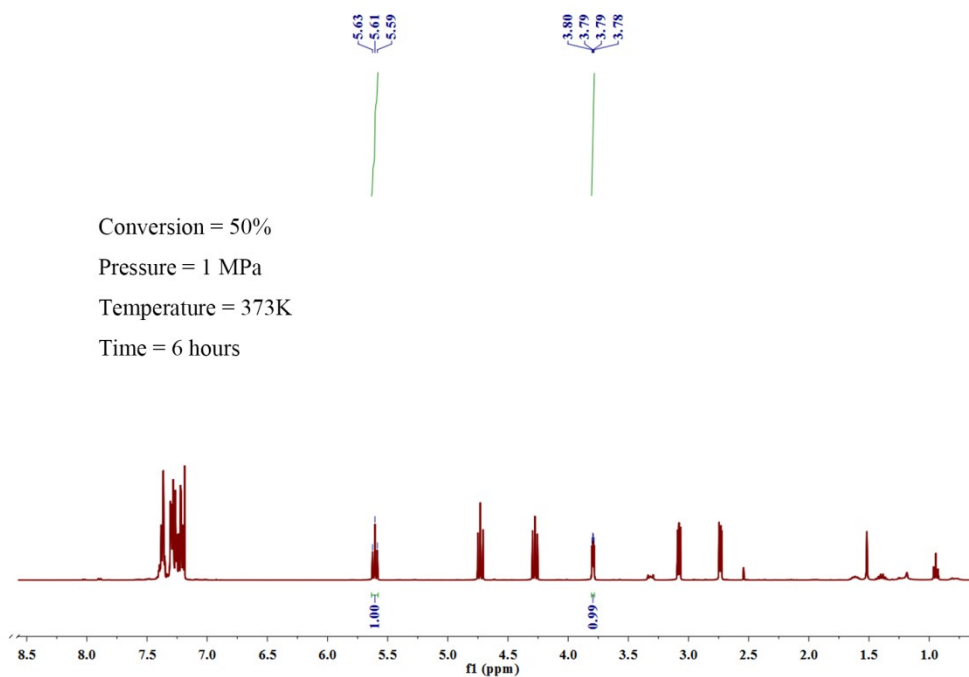

Figure S32.  $^1\text{H}$  NMR spectra of the cycloaddition product of styrene oxide and  $\text{CO}_2$  for 4h (400 MHz,  $\text{CDCl}_3$ ):  $\delta$  = 7.29 – 7.38 (m, 5H, Ar-H), 7.19 – 7.26 (m, 2.58H, Ar-H), 5.60 (t,  $J$  = 8.0 Hz, 1H, COO-CH), 4.73 (t,  $J$  = 8.0 Hz, 1H, COO- $\text{CH}_2$ ), 4.27 (t,  $J$  = 8.0 Hz, 1H, COO- $\text{CH}_2$ ), 3.79 (q,  $J$  = 4.0 Hz, 0.70H, O-CH), 3.08 (q,  $J$  = 4.0 Hz, 0.70H, O- $\text{CH}_2$ ), 2.73 (q,  $J$  = 4.0 Hz, 0.70H, O- $\text{CH}_2$ ).

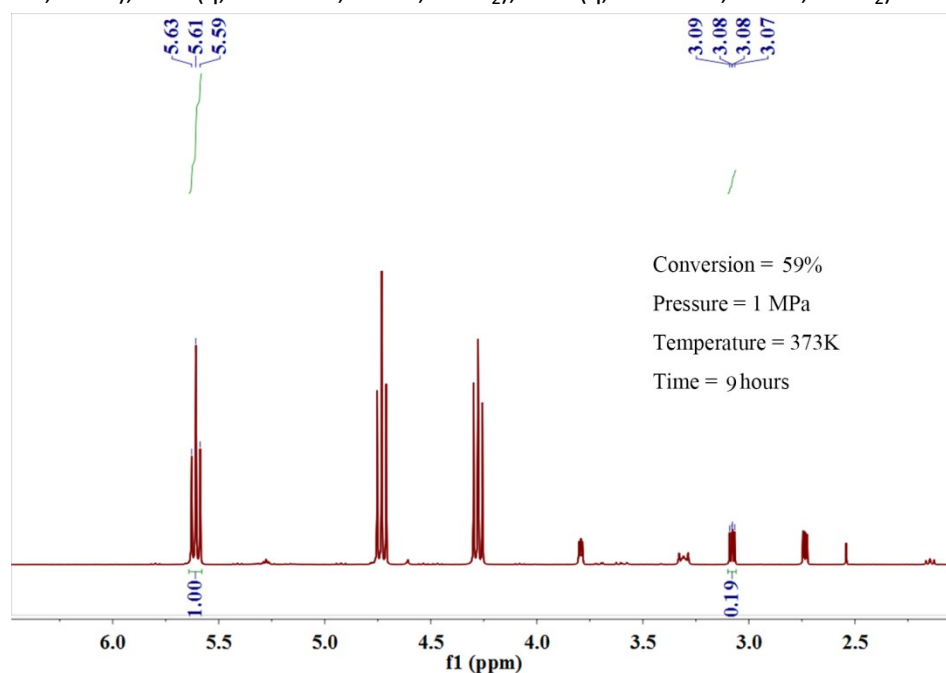

Figure S33.  $^1\text{H}$  NMR spectra of the cycloaddition product of styrene oxide and  $\text{CO}_2$  for 4h (400 MHz,  $\text{CDCl}_3$ ):  $\delta$  = 7.29 – 7.38 (m, 5H, Ar-H), 7.19 – 7.26 (m, 2.58H, Ar-H), 5.60 (t,  $J$  = 8.0 Hz, 1H, COO-CH), 4.73 (t,  $J$  = 8.0 Hz, 1H, COO- $\text{CH}_2$ ), 4.27 (t,  $J$  = 8.0 Hz, 1H, COO- $\text{CH}_2$ ), 3.79 (q,  $J$  = 4.0 Hz, 0.70H, O-CH), 3.08 (q,  $J$  = 4.0 Hz, 0.70H, O- $\text{CH}_2$ ), 2.73 (q,  $J$  = 4.0 Hz, 0.70H, O- $\text{CH}_2$ ).

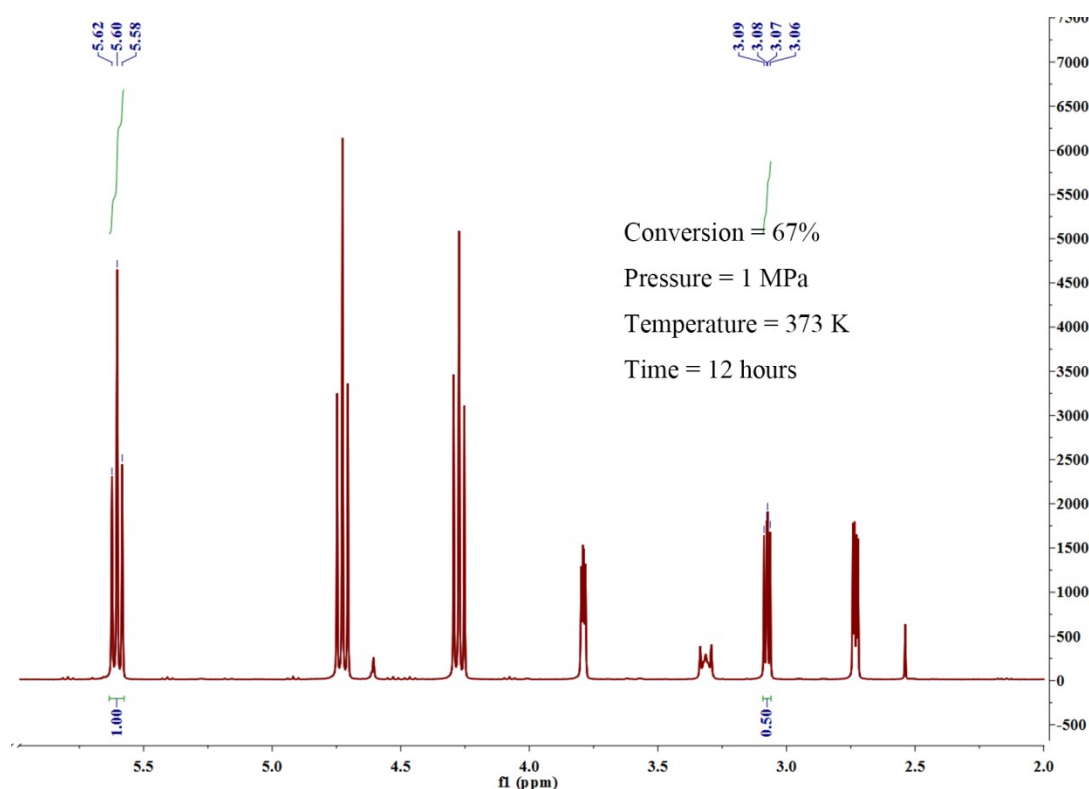

Figure S34.  $^1\text{H}$  NMR spectra of the cycloaddition product of styrene oxide and  $\text{CO}_2$  for 4h (400 MHz,  $\text{CDCl}_3$ ):  $\delta = 7.29 - 7.38$  (m, 5H, Ar-H),  $7.19 - 7.26$  (m, 2.58H, Ar-H),  $5.60$  (t,  $J = 8.0$  Hz, 1H, COO-CH),  $4.73$  (t,  $J = 8.0$  Hz, 1H, COO- $\text{CH}_2$ ),  $4.27$  (t,  $J = 8.0$  Hz, 1H, COO- $\text{CH}_2$ ),  $3.79$  (q,  $J = 4.0$  Hz, 0.70H, O-CH),  $3.08$  (q,  $J = 4.0$  Hz, 0.70H, O- $\text{CH}_2$ ),  $2.73$  (q,  $J = 4.0$  Hz, 0.70H, O- $\text{CH}_2$ ).

1. SMART and SAINT software package, Siemens Analytical X-ray Instruments Inc., Madison, WI, 1996.
2. (a) O.V. Dolomanov, L.J. Bourhis, R.J. Gildea, J. A. K. Howard and H. Puschmann, *J. Appl. Cryst.* 2009, 42, 339; (b) G. M. Sheldrick, *ActaCryst. A*, 2008, 64, 112; (c) G. M. Sheldrick, *ActaCryst. C*, 2015, 71, 3.
3. V.Guillerm, Ł. J.Weseliński, Y.Belmabkhout, A. J.Cairns, V.D'Elia, Ł.Wojtas, K.Adil, M.Eddaoudi, *Nature Chem.* 2014, 6, 673.
4. A. C. Kathalikkattil, D. W. Kim, J. Tharun, H. G. Soek, R. Roshan and D. W. Park, *Green Chem.* 2014, **16**, 1607.
5. Y. W. Ren, Y. C. Shi, J. X. Chen, S. R. Yang, C. R. Qi and H. F. Jiang, *RSC Adv.* 2013, 3, 2167.
6. C.-Y. Gao, H.-R. Tian, J. Ai, L.-J. Li, S. Dang, Y.-Q. Lan and Z.-M. Sun, *Chem. Commun.*, 2016, **52**, 11147.



7. H. Xu, B. Zhai, C.-S. Cao and B. Zhao, *Inorg. Chem.*, 2016, **55**, 9671.
8. P.-Z. Li, X.-J. Wang, J. Liu, J.S. Lim, R. Zou and Y. Zhao, *J. Am. Chem. Soc.*, 2016, **138**, 2142.
9. Z. Zhou, C. He, J. Xiu, L. Yang and C. Duan, *J. Am. Chem. Soc.*, 2015, **137**, 15066.
10. D. De, T. K. Pal, S. Neogi, S. Senthilkumar, D. Das, S. S. Gupta and P. K. Bharadwaj, *Chem. Eur. J.*, 2016, **22**, 3387.
